# Supplementary material for: ROS play a critical role in the differentiation of alternatively activated macrophages and the occurrence of tumor-associated macrophages
Source: PubMed Central journal article supplement — Cell Res. 2013 Jun 11;23(7):898–914. doi: 10.1038/cr.2013.75 (PMC3698641; doi:10.1038/cr.2013.75), 2013-06-11
Supplement: cr201375x6.pdf [file cr201375x6.pdf]

### *Kras*<sup>LA2</sup> primary lung tumors

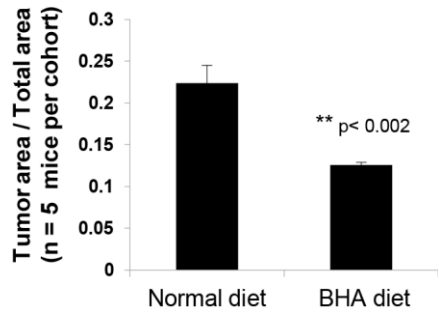

### Supplementary information, Figure S6 (related to Figure 6)

Analysis of *Kras*<sup>LA2</sup> lung tumors. Tumor burden of 5 month old *Kras*<sup>LA2</sup> mice maintained on BHA diet or normal diet at 3 weeks of age is shown as the average ratio of tumor area to the whole lung area measured in 5 serial sections. Error Bars: +/- SEM. n=5.
